# Supplementary material for: The TGA Transcription Factors from Clade II Negatively Regulate the Salicylic Acid Accumulation in Arabidopsis
Source: MDPI journal article supplement (doi:10.3390/ijms231911631), 2022-10-01
Supplement: s1 [file s1]

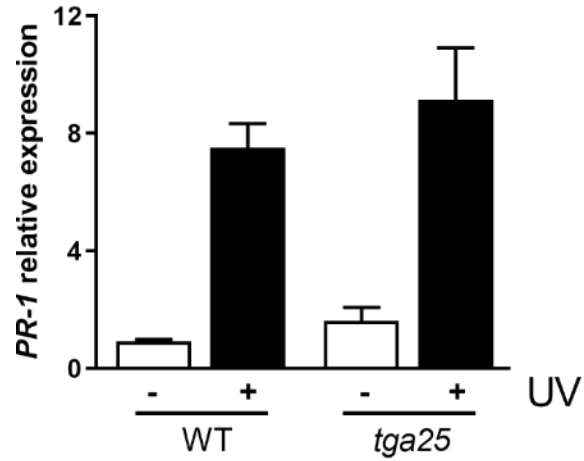

**Figure S1. The PR-1 transcript is not differentially expressed in the *tga2-1/tga5-1* mutant plant compared to WT in response to UV-C.** *PR-1* transcript was evaluated in WT and the double mutants *tga2-1/tga5-1* (*tga25*). 15-day-old plate-grown plants were irradiated with UV-C for 20 minutes (+). Plants covered with a UV-C filter were used as control (—). After the treatment, plants were transferred to normal growth conditions. Samples were frozen after 24 hours. RNA was extracted, cDNA was synthesized, and *PR-1* expression was evaluated by qPCR. Bars indicate the mean of the relative expression of *PR-1*  $\pm$  SEM from four biological replicates (n=4). No statistical differences were detected between genotypes according to a 2-way ANOVA and Sidak's post-test (p>0.1).



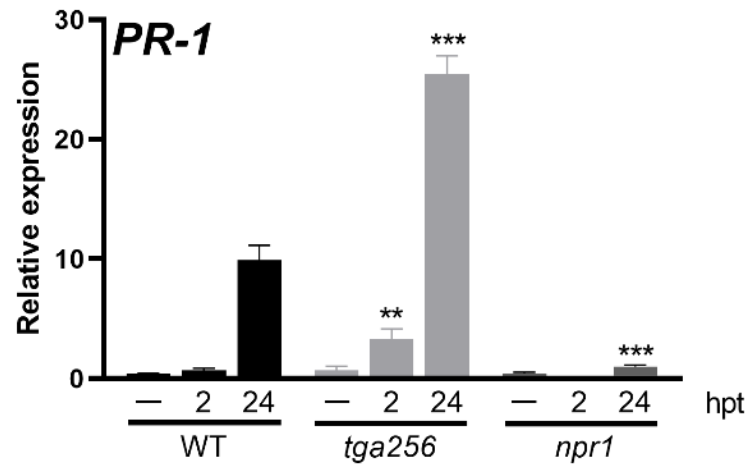

**Figure S3: *PR-1* expression depends on the NPR1 in UV-C treatment.** 15-day-old WT, *tga2-1/tga5-1/tga6-1* (*tga256*), and *npr1-2* (*npr1*) mutant seedlings were treated with UV-C. Non-irradiated seedlings were used as controls (—). Treated seedlings were frozen two and 24 hour post-treatment (hpt). RNA was extracted, and the *PR-1* expression was evaluated by RT-qPCR. Bars represent the mean of the relative expression  $\pm$  SEM from four biological replicates. Asterisks indicate statistically significant differences between the mutant genotypes and the WT plants according to a 2-way ANOVA analysis and Sidak's post-test (\*\*: $p < 0.01$ , \*\*\*: $p < 0.001$ ).

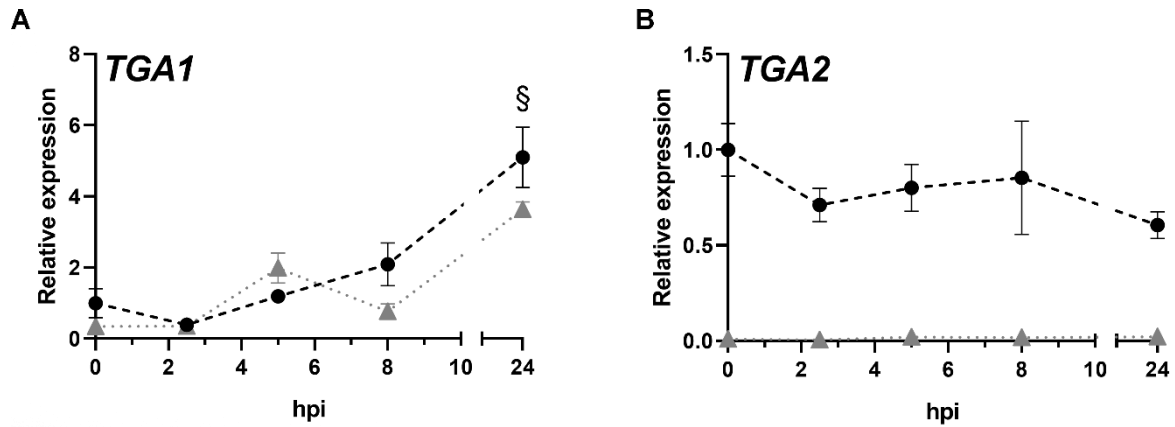

**Figure S4: The TGA2 gene is not induced by the treatment that induces the SA accumulation.** 4-week-old WT (black circles) and *tga256* mutant (gray triangles) plants were syringe-infiltrated with Pst DC3000/AvrRPM1 ( $OD_{\lambda 600}=0.01$ ). Samples were collected 2.5, 5, 8, and 24 hours post inoculation (hpi). Noninoculated plants were used as controls (0 hpi). RNA was extracted, and the gene expression of **(A)** *TGA1* and **(B)** *TGA2* was evaluated by RT-qPCR. The data represents the mean of the relative gene expression  $\pm$  SEM from 4 biological replicates. No differences were detected in the *TGA1* expression between genotypes. § indicate a statistically significant difference compared to the control condition and time zero. No statistically significant differences were detected in the *TGA2* expression in WT plants compared to time zero ( $p>0.05$ ). As expected, *TGA2* was not detected in the *tga256* genotype.

**Table S1. Oligonucleotides**

|                   | AGI                 | Gene                 |                       | Sequence                                                               |
|-------------------|---------------------|----------------------|-----------------------|------------------------------------------------------------------------|
| RTqPCR            | AT2G14610           | <i>PR-1</i>          | Fw<br>Rv              | ACACGTGCAATGGAGTTTGTGG<br>TTGGCACATCCGAGTCTCACTG                       |
|                   | AT3G48090           | <i>EDS1</i>          | Fw<br>Rv              | CGAAGGGGACATAGATTGGA<br>ATGTACGGCCCTGTGTCTTC                           |
|                   | AT3G52430           | <i>PAD4</i>          | Fw<br>Rv              | GCAAGTATCTTGCGTTGTGC<br>TAAAGACTGGCGGGCATTAC                           |
|                   | AT5G26920           | <i>CBP60g</i>        | Fw<br>Rv              | AATAACGAGGAGGATGAGAACG<br>TCAGACACGGTAAGAAACATCG                       |
|                   | AT1G73805           | <i>SARD1</i>         | Fw<br>Rv              | CCTCAACCAGCCCTACGTTA<br>TAGTGGCTCGCAGCATATTG                           |
|                   | AT4G39030           | <i>EDS5</i>          | Fw<br>Rv              | GTGACAAGAAGTGGCTATGGTTT<br>GACTCGGCCCATCTGAATTA                        |
|                   | AT5G13320           | <i>PBS3</i>          | Fw<br>Rv              | GCGTTGTTGTAGAAACCAGTCACC<br>GTTGTCACAAATTCGCTGGCTTG                    |
|                   | AT5G65210           | <i>TGA1</i>          | Fw<br>Rv              | ACGAACCTGTCCATCAATTCGG<br>CCATGGGAAGTATCCTCTGACACG                     |
|                   | AT5G06950           | <i>TGA2</i>          | Fw<br>Rv              | AAAGCTTCTGGCGAATCAGTTGG<br>TGACTGTTGTAAGCTCTCCATCCC                    |
|                   | AT5G08290           | <i>YLS8</i>          | Fw<br>Rv              | TTACTGTTTCGGTTGTTCTCCATT<br>CACTGAATCATGTTTGAAGCAAGT                   |
|                   | AT1G74710           | <i>ICS1</i>          | Fw<br>Rv              | CACTGCAGACACCTAATTGAGTCC<br>GCTTGGCTAGCACAGTTACAGC                     |
| Genotype analysis | AT1G74710           | <i>sid2-2</i>        | Fw Mut<br>Fw WT<br>Rv | TTCTTCATGCAGGGGAGGAG<br>CAACCACCTGGTGCACCAGC<br>AAGCAAAATGTTTGAGTCAGCA |
|                   | AT5G06950/AT5G06960 | <i>tga2-1/tga5-1</i> | Fw<br>Rv WT<br>Rv mut | CTTTCCTCGGCAAGTCAATC<br>CCCAAGCTCTCTGATTTTGC<br>TATGTTGTGACCGGACCAGA   |
|                   | AT3G12250           | <i>tga6-1</i>        | Fw<br>Rv WT<br>Rv mut | CAGCAACCAAATTCATCG<br>CAAGCCTCCCAGGAGTGA<br>AGCAGCGTCACCACATCA         |
|                   |                     |                      |                       |                                                                        |
|                   |                     |                      |                       |                                                                        |
|                   |                     |                      |                       |                                                                        |
